# Supplementary material for: A Forward Genetic Screen and Whole Genome Sequencing Identify Deflagellation Defective Mutants in Chlamydomonas, Including Assignment of ADF1 as a TRP Channel
Source: PubMed Central journal article supplement (PMC5068960; doi:10.1534/g3.116.034264), 2016-08-12
Supplement: supp_g3.116.034264_TableS1.pdf [file supp_g3.116.034264_TableS1.pdf]

## SUPPLEMENTAL MATERIAL

**Table S1:** Summary of sequencing results from WGS.

| Sample         | Sequencing Type | Read Length (bp) | Fold Coverage | Mean Q-score | Total Variants | Unique Variants | %Unique Variants |
|----------------|-----------------|------------------|---------------|--------------|----------------|-----------------|------------------|
| <i>adf1-2</i>  | HiSeq           | 126              | 27.9          | 35.84        | 232411         | 5952            | 2.6              |
| <i>adf1-3</i>  | HiSeq           | 126              | 73.9          | 35.82        | 255376         | 21892           | 8.6              |
| <i>adf1-3R</i> | HiSeq           | 101              | 39.1          | 34.89        | 264015         | 49431           | 18.7             |
| <i>adf1-3R</i> | HiSeq           | 126              | 56.1          | 35.20        | 314922         | 85617           | 27.2             |
| <i>adf1-4</i>  | HiSeq           | 126              | 89.7          | 34.72        | 237680         | 14070           | 5.9              |
| <i>adf1-5</i>  | HiSeq           | 126              | 71.2          | 34.97        | 234785         | 11447           | 4.9              |
| <i>adf1-6</i>  | HiSeq           | 126              | 51.8          | 35.60        | 257873         | 32072           | 12.4             |
| <i>adf1-7</i>  | HiSeq           | 126              | 57.0          | 34.94        | 10562          | 2382            | 22.6             |
| <i>adf1-12</i> | HiSeq           | 126              | 76.4          | 35.00        | 4541           | 965             | 21.3             |
| <i>adf1-13</i> | HiSeq           | 126              | 48.8          | 35.55        | 9726           | 2221            | 22.8             |
| <i>adf1-14</i> | HiSeq           | 101              | 45.9          | 33.23        | 8072           | 1287            | 15.9             |
| <i>adf1-15</i> | HiSeq           | 126              | 70.2          | 35.60        | 10762          | 1836            | 17.1             |
| <i>adf1-16</i> | HiSeq           | 101              | 34.4          | 34.01        | 8537           | 1887            | 22.1             |
| <i>adf1-17</i> | HiSeq           | 126              | 76.2          | 34.00        | 4703           | 876             | 18.6             |
| <i>adf2-1</i>  | MiSeq           | 151              | 21.7          | 33.99        | 7190           | 1891            | 26.3             |
| <i>adf3-1</i>  | MiSeq           | 151              | 15.9          | 34.15        | 7340           | 2758            | 37.6             |
| <i>adf3-2</i>  | HiSeq           | 101              | 33.3          | 33.89        | 8554           | 1577            | 18.4             |
| <i>adf4-1</i>  | HiSeq           | 101              | 31.0          | 34.15        | 8449           | 2035            | 24.1             |
| E4.1 P1 H3     | HiSeq           | 101              | 32.5          | 34.23        | 8414           | 1799            | 21.4             |
| E5.1 P8 A12    | HiSeq           | 101              | 35.0          | 34.08        | 8725           | 1833            | 21.0             |
| <i>fa1-6</i>   | HiSeq           | 126              | 73.3          | 34.76        | 4366           | 840             | 19.2             |
| <i>fa1-7</i>   | HiSeq           | 101              | 34.9          | 34.07        | 12607          | 2460            | 19.5             |
| <i>fa2-5</i>   | HiSeq           | 126              | 67.6          | 34.76        | 4730           | 938             | 19.8             |
| <i>fa2-6</i>   | HiSeq           | 126              | 69.7          | 34.58        | 4586           | 831             | 18.1             |
| <i>fa2-7</i>   | HiSeq           | 126              | 72.5          | 34.66        | 4406           | 764             | 17.3             |
