# Supplementary material for: A Forward Genetic Screen and Whole Genome Sequencing Identify Deflagellation Defective Mutants in Chlamydomonas, Including Assignment of ADF1 as a TRP Channel
Source: PubMed Central journal article supplement (PMC5068960; doi:10.1534/g3.116.034264), 2016-08-12
Supplement: supp_g3.116.034264_TableS2.pdf [file supp_g3.116.034264_TableS2.pdf]

**Table S2.** Accession numbers for genes used in phylogenetic analysis of TRP15.

|        | <i>M. musculus</i> | <i>D. melanogaster</i> | <i>A. queenslandica</i> | <i>T. adhaerens</i> | <i>M. brevicollis</i> | <i>C. elegans</i> | <i>D. rerio</i> | <i>C. reinhardtii</i> |
|--------|--------------------|------------------------|-------------------------|---------------------|-----------------------|-------------------|-----------------|-----------------------|
| TRPN   |                    | DmNOMPC                |                         |                     |                       | CeTRP-4           | DrTRPN1         |                       |
|        |                    | NP_523483.2            |                         |                     |                       | CAC14420.3        | NP_899192.1     |                       |
| TRPA   | MmTRPA1            | DmTRPA1                | AqTRPA1-3               |                     | MbTRPA1-1             |                   |                 |                       |
|        | NP_808449.1        | NP_648263.5            | XP_003388066            |                     | jgi Monbr1 22693      |                   |                 |                       |
| TRPM   | MmTRPM1            | DmTRPM                 |                         | TaTRPM1             | MbTRPM1               |                   |                 |                       |
|        | NP_001034193.2     | NP_001036548.1         |                         | jgi Triad1 58797    | jgi Monbr1 27446      |                   |                 |                       |
| TRPML  | MmTRPML1           | DmTRPML                | AqTRPML2                | TaTRPML             | MbTRPML               |                   |                 |                       |
|        | NP_444407.1        | NP_649145.1            | XP_0011402441.1         | jgi Triad1 27592    | jgi Monbr1 5128       |                   |                 |                       |
| TRPC   | MmTRPC1            | DmTRPgamma             |                         |                     | MbTRPC                |                   |                 |                       |
|        | NP_035773.1        | NP_609802.1            |                         |                     | jgi Monbr1 27307      |                   |                 |                       |
| TRPV   | MmTRPV1            | DmNan                  |                         | TaTRPV1             | MbTRPV                |                   |                 |                       |
|        | NP_001001445.1     | NP_001261833.1         |                         | jgi Triad1 58478    | jgi Monbr1 22556      |                   |                 |                       |
| TRPP   | MmTRPP2            | DmPkd2                 |                         | TaTRPP1             |                       |                   |                 | CrPKD2                |
|        | NP_032887.3        | NP_609561.2            |                         | jgi Triad1 28998    |                       |                   |                 | Cre17.g715300         |
| Shaker | MmShaker           | DmShaker               | AqShaker                | TaShaker            | MbShaker              |                   |                 | CrShaker              |
|        | INP_067250.2       | CAA29917.1             | XP_011404770.1          | jgi Triad1 2482     | jgi Monbr1 8918       |                   |                 | Cre10.g432550         |
|        |                    |                        |                         |                     |                       |                   |                 | CrTRP15               |
|        |                    |                        |                         |                     |                       |                   |                 | Cre09.g397142         |
