# Supplementary material for: A Forward Genetic Screen and Whole Genome Sequencing Identify Deflagellation Defective Mutants in Chlamydomonas, Including Assignment of ADF1 as a TRP Channel
Source: PubMed Central journal article supplement (PMC5068960; doi:10.1534/g3.116.034264), 2016-08-12
Supplement: supp_g3.116.034264_TableS3.pdf [file supp_g3.116.034264_TableS3.pdf]

**Table S3. Accession numbers for proteins used in phylogenetic analysis of FAP16.**

| <b>Gene Name</b> | <b>Accession Number</b> |
|------------------|-------------------------|
| EML1_Human       | NP_004425               |
| EML2_Human       | NP_036287               |
| EML3_Human       | NP_694997               |
| EML4_Human       | EAX00324                |
| EML5_Human       | NP_899243               |
| EML6_Human       | NP_001034842            |
| Cr_MOT51         | Cre03.g178050           |
| Cr_FAP16         | Cre06.g303400           |
| Cre12.g538850    | Cre12.g538850           |
| Xenopus eml4     | F6SW47                  |
| Sea Urchin EMAP  | NP_999633               |
| Drosophila EMAP  | NP_001261850            |
| VOLCADRAFT_96225 | D8U9J7                  |
| Volvox MOT51     | XP_002946691            |
| VOLCADRAFT_91380 | D8TWX1                  |
| C. elegans elp-1 | NP_001256950            |
| Human MAP2       | NP_002365               |
| Transducin       | XP_002885447            |
| PWP2_Yeast       | NP_009984               |
